# Supplementary material for: Disentangling Unusual Catalytic Properties and the Role of the [4Fe-4S] Cluster of Three Endonuclease III from the Extremophile D. radiodurans
Source: MDPI journal article supplement (doi:10.3390/molecules27134270), 2022-07-02
Supplement: s1 [file s1]

## Supplementary tables

**Table S1.** Primers for mutagenesis.

| Primers                    | Sequence                                                                                       |
|----------------------------|------------------------------------------------------------------------------------------------|
| <b>EndoIII1 R61Q</b>       | Fw ATCCTCTCGCAG <b>CAG</b> ACCACCCACGCCGAC<br>Rv GTCGGCGTGGGTGGT <b>TCT</b> GCTGCGAGAGGAT      |
| <b>EndoIII1 Y100L</b>      | Fw CGCCGCAGCAAT <b>CTG</b> CCTGAGAGCAAGGCC<br>Rv GGCCTTGCTCTCAGG <b>CAG</b> ATTGCTGCGGCG       |
| <b>EndoIII2 C199A</b>      | Fw GCCGCCGCGT <b>CG</b> CCACGCCCGCA<br>Rv TGCGGGCGTGG <b>GCG</b> ACGCGGCGGC                    |
| <b>EndoIII2 C199S</b>      | Fw CCGCCGCGT <b>CAG</b> CCACGCCCG<br>Rv CGGGCGTGG <b>CTG</b> ACGCGGCGG                         |
| <b>EndoIII2 C206S</b>      | Fw GCAAGCCCC <b>AG</b> AGCCCGTCGTGC<br>Rv GCACGACGGG <b>CTC</b> TGGGGCTTGC                     |
| <b>EndoIII2 C209S</b>      | Fw CCA GTG CCC GTC <b>GAG</b> CGA ATT GGC GAG<br>Rv CTC GCC AAT TCG <b>CTC</b> GAC GGG CAC TGG |
| <b>EndoIII2 C215S</b>      | Fw GAATTGGCGAGCTT <b>CAG</b> TCCGAAAGTAGGGG<br>Rv CCCCTACTTTCGGACT <b>GAA</b> GCTCGCCAATTC     |
| <b>EndoIII3 G250TN251H</b> | Fw ATGCCGGTGGAT <b>ACCC</b> ACATGGAACGGGCG<br>Rv CGCCCGTTCCAT <b>GTGGG</b> TATCCACCGGCAT       |
| <b>EndoIII3 R139D</b>      | Fw GCAGCAAAACAC <b>CGA</b> CCGGGTCGCGCAG<br>Rv CTGCGCGACCC <b>GTC</b> GGTGTTTTGCTGC            |

**Table S2.** X-ray data collection and refinement statistics. Values in parentheses belong to the highest resolution shell.

|                                      | <b>EIII1 R61Q</b>                                               | <b>EIII1 Y100L</b>                                              | <b>EIII3<br/>G250T/N251H</b>                                   |
|--------------------------------------|-----------------------------------------------------------------|-----------------------------------------------------------------|----------------------------------------------------------------|
| <b>Data collection</b>               |                                                                 |                                                                 |                                                                |
| Beamline                             | ALBA XALOC                                                      | ALBA XALOC                                                      | ALBA XALOC                                                     |
| Wavelength (Å)                       | 0.97926                                                         | 0.97926                                                         | 0.97926                                                        |
| Space group                          | <i>C 1 2 1</i>                                                  | <i>C 1 2 1</i>                                                  | <i>C 1 2 1</i>                                                 |
| Unit cell parameters (Å, °)          | <i>a</i> = 179.3, <i>b</i> = 38.0,<br><i>c</i> = 36.4, β = 91.0 | <i>a</i> = 178.5, <i>b</i> = 37.8,<br><i>c</i> = 36.6, β = 90.6 | <i>a</i> = 90.3, <i>b</i> = 38.8,<br><i>c</i> = 72.0, β = 99.7 |
| Resolution (Å)                       | 44.82 – 1.38<br>(1.47 – 1.38)                                   | 44.63 - 1.95<br>(2.05 – 1.95)                                   | 44.53 – 1.89<br>(1.99 – 1.89)                                  |
| Nr. observations                     | 146093 (22818)                                                  | 56386 (9040)                                                    | 65506 (9163)                                                   |
| Nr. unique reflections               | 50163 (8090)                                                    | 17563 (2766)                                                    | 19937 (3111)                                                   |
| Completeness (%)                     | 98.9 (99.1)                                                     | 97.1 (96.2)                                                     | 99.1 (97.6)                                                    |
| Multiplicity                         | 2.9 (2.8)                                                       | 3.2 (3.3)                                                       | 3.3 (2.9)                                                      |
| Mosaicity (°)                        | 0.16                                                            | 0.14                                                            | 0.15                                                           |
| CC <sub>1/2</sub> (%) <sup>a</sup>   | 99.4 (46.2)                                                     | 99.7 (49.7)                                                     | 99.9 (49.8)                                                    |
| R <sub>sym</sub> (%) <sup>b</sup>    | 5.8 (89.6)                                                      | 4.9 (74.9)                                                      | 4.2 (54.4)                                                     |
| R <sub>meas</sub> (%) <sup>c</sup>   | 7.2 (83.9)                                                      | 6.2 (91.4)                                                      | 5.9 (71.2)                                                     |
| R <sub>p.i.m.</sub> (%) <sup>d</sup> | 4.0 (31.3)                                                      | 3.4 (31.1)                                                      | 3.0 (28.3)                                                     |
| <I/σ(I)>                             | 8.85 (0.99)                                                     | 9.88 (1.07)                                                     | 13.71 (1.61)                                                   |

|                                                   |       |       |       |
|---------------------------------------------------|-------|-------|-------|
| Wilson B (Å <sup>2</sup> )                        | 31.6  | 56.7  | 39.1  |
| V <sub>M</sub> (Å <sup>3</sup> Da <sup>-1</sup> ) | 2.08  | 2.08  | 1.98  |
| Estimated solvent content (%)                     | 41.0  | 40.8  | 37.8  |
| <b>Refinement</b>                                 |       |       |       |
| R <sub>work</sub> (%) <sup>c</sup>                | 15.1  | 19.4  | 23.8  |
| R <sub>free</sub> (%) <sup>c</sup>                | 18.0  | 24.7  | 28.9  |
| rmsd for bond lengths (Å)                         | 0.005 | 0.008 | 0.008 |
| rmsd for bond angles (°)                          | 0.696 | 0.824 | 0.870 |
| Structure < <i>a.d.p.</i> > (Å <sup>2</sup> )     | 36.1  | 75.8  | 50.6  |
| Ramachandran plot                                 |       |       |       |
| Residues in favored regions (%)                   | 97.9  | 94.5  | 97.0  |
| Residues in allowed regions (%)                   | 2.1   | 5.5   | 3.0   |
| Residues in disallowed regions (%)                | 0     | 0     | 0     |
| PDB code                                          | 8A5F  | 8A5C  | 8A5G  |

<sup>a</sup> CC<sub>1/2</sub> = Percentage of correlation between intensities from random half-datasets (Karplus & Diederichs, 2012).

<sup>b</sup> R<sub>sym</sub> =  $\sum hkl \sum i |I_i(hkl) - \langle I(hkl) \rangle| / \sum hkl \sum i I_i(hkl)$ , where I<sub>i</sub>(hkl) is the observed intensity and <I(hkl)> is the average intensity of multiple observations from symmetry-related reflection (Arndt et al., 1968).

<sup>c</sup> R<sub>meas</sub> =  $\sum hkl [N/(N(hkl) - 1)]^{1/2} \sum i |I_i(hkl) - \langle I(hkl) \rangle| / \sum hkl \sum i I_i(hkl)$ , where N(hkl) is the data multiplicity, I<sub>i</sub>(hkl) is the observed intensity and <I(hkl)> is the average intensity of multiple observations from symmetry-related reflections. It is an indicator of the agreement between symmetry related observation (Diederichs & Karplus, 1997).

<sup>d</sup> R<sub>p.i.m.</sub> =  $\sum hkl [1/(N(hkl) - 1)]^{1/2} \sum i |I_i(hkl) - \langle I(hkl) \rangle| / \sum hkl \sum i I_i(hkl)$ , where N(hkl) is the data multiplicity, I<sub>i</sub>(hkl) is the observed intensity and <I(hkl)> is the average intensity of multiple observations from symmetry-related reflections. It is an indicator of the precision of the final merged and averaged data set (Weiss, 2001).

<sup>e</sup> R<sub>work</sub> refers to the actual working data set used in refinement, while R<sub>free</sub> refers to a cross validation set that is not directly used in refinement and is therefore free from refinement bias.

**Table S3.** Oligonucleotides used for probing DrEndoIII activity.

| SUBSTRATE                       | SEQUENCE                                               |
|---------------------------------|--------------------------------------------------------|
| <b>TG SUBSTRATE (6-FAM)</b>     | TGTCAATAGCAAG( <b>ThyGly</b> )GGAGAAGTCAATCGTGAGTCT    |
| <b>URACIL SUBSTRATE (6-FAM)</b> | TGTCAATAGCAAG <b>U</b> GGAGAAGTCAATCGTGAGTCT           |
| <b>REVERSE G</b>                | AGACTCACGATTGACTTCTCC <b>G</b> CTTGCTATTGACA           |
| <b>REVERSE A</b>                | AGACTCACGATTGACTTCTCC <b>A</b> CTTGCTATTGACA           |
| <b>THF SUBSTRATE (6-FAM)</b>    | AGCTACCATGCCTGCACGAAX <b>T</b> AAGCAATTCGTAATCATGGTCAT |
| <b>REVERSE G</b>                | ATGACCATGATTACGAATTGCTTAG <b>T</b> TCGTGCAGGCATGGTAGCT |
| <b>FORWARD C</b>                | AGCTACCATGCCTGCACGA <b>A</b> CTAAGCAATTCGTAATCATGGTCAT |

**Table S4.** DrEndoIII native and mutated enzymes temperature melting point.

| Protein                 | TM (°C) |
|-------------------------|---------|
| EndoIII1                | 63      |
| EndoIII2                | 62      |
| EndoIII3                | 61      |
| EndoIII1 R61Q           | 62.4    |
| EndoIII1<br>Y100L       | 62.13   |
| EndoIII3<br>G250T/N251H | 60      |

**Table S5.** Determination in percentage through RR, of the amount of [3Fe-4S] and [4Fe-4S] present in solution in DrEndoIII2 C199S.

| time (h) | [3Fe-4S] | [4Fe-4S] |
|----------|----------|----------|
| 0        | 74       | 26       |
| 5        | 79       | 21       |
| 16       | 85       | 15       |

## Supplementary Figures

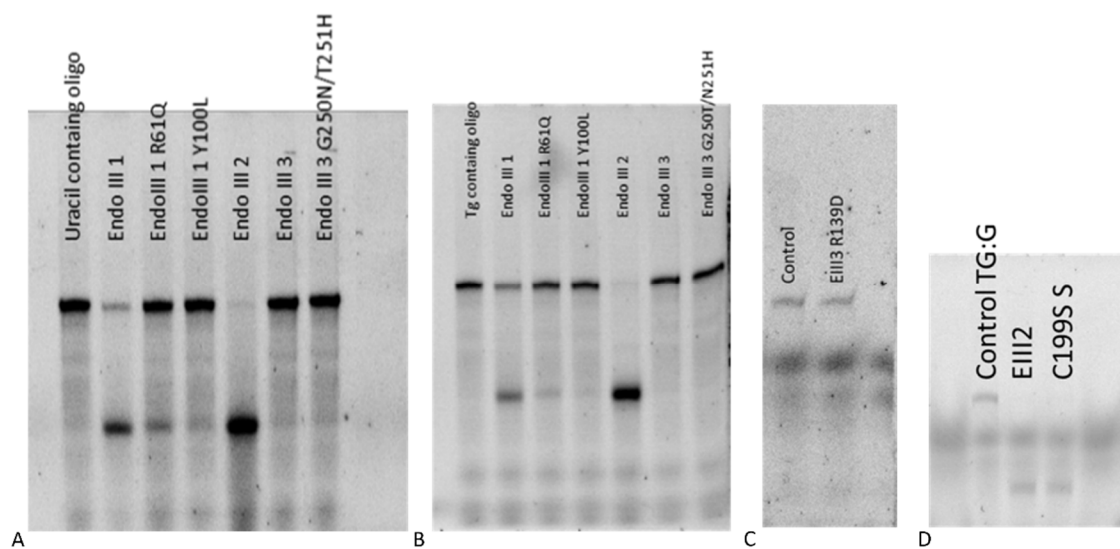

**Figure S1.** Denaturing gel electrophoresis analysis of the processing of Tg containing DNA by DrEndoIII1 and DrEndoIII2 and DrEndoIII3 (wild-type and mutants). AP-lyase activity (A), DNA glycosylase activity (B), activity of DrEndoIII3 R139D (C) and activity of DrEndoIII2 C199S (D).

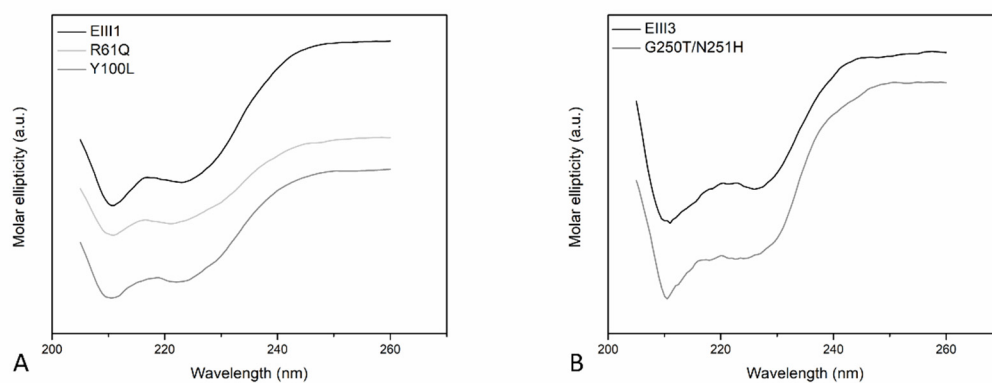

**Figure S2.** CD spectra of DrEndoIII1, DrEndoIII1 R61Q and Y100L (A), and DrEndoIII3 and DrEndoIII3 G250T/N251H (B).

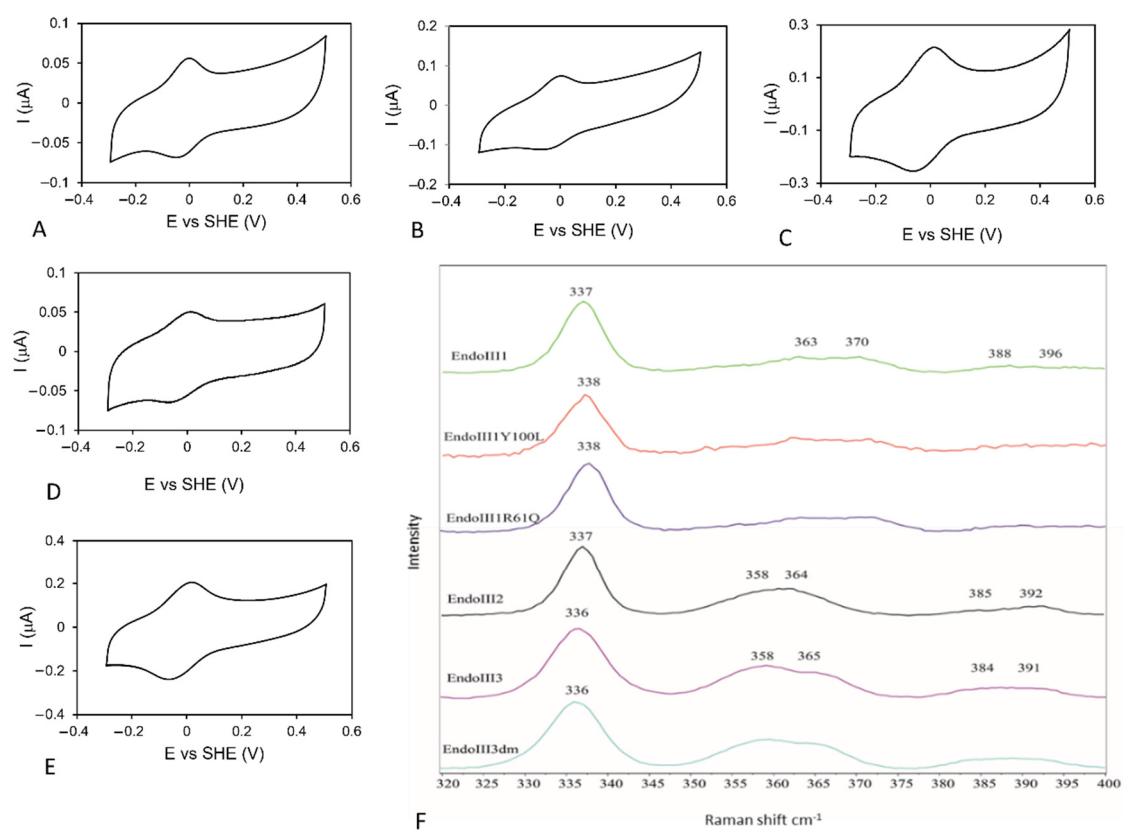

**Figure S3.** CV of DrEndoIII1 R61Q (A) and Y100L (B); DrEndoIII3 (C) and DrEndoIII3G250T/N251H (D); DrEndoIII2 (E), on Au electrodes coated with 11-mercaptopundecanoic acid (MUA) in 50 mM Tris-HCl pH 8.5, 50 mM NaCl buffer. Scan rate: 50 mV/s. F) RR spectra DrEndoIII1, DrEndoIII1R61Q and DrEndoIII1Y100L; DrEndoIII2; DrEndoIII3 and DrEndoIII3G250T/N251H in the resting state.

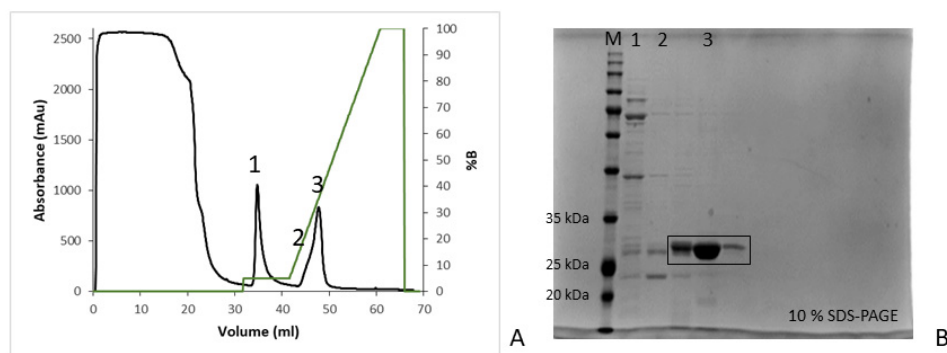

**Figure S4.** Chromatogram of HisTrap purification of DrEndoIII2 C199S (A) and SDS-PAGE analysis of DrEndoIII2 C199S purification from different peaks (1, 2 and 3) highlighted in the chromatogram (B) (M- NZYColour protein marker II from NZYTech).

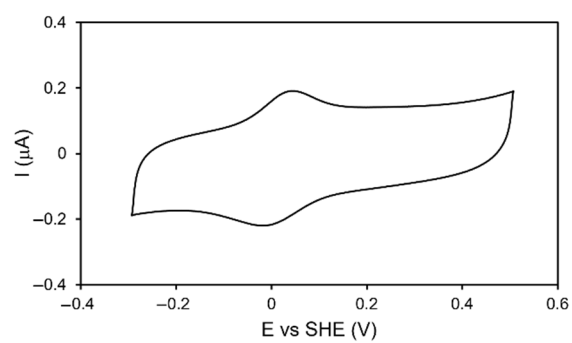

**Figure S5.** CV DrEndoIII2 C199S immobilized on Au electrodes coated with 11-mercaptopundecanoic acid (MUA) in 50 mM Tris-HCl pH 7.5 (B), 50 mM NaCl buffer terminated SAM.  $V_{scan}$  50 mV/s.
